# Supplementary material for: Overexpression of PtDXS Enhances Stress Resistance in Poplars
Source: PubMed Central journal article supplement (PMC6479640; doi:10.3390/ijms20071669), 2019-04-03
Supplement: ijms-20-01669-s001.pdf [file ijms-20-01669-s001.pdf]

|                            |     |                                                                                                        |
|----------------------------|-----|--------------------------------------------------------------------------------------------------------|
|                            |     | -VXA-                                                                                                  |
| <i>Populus trichocarpa</i> | 1   | MALSAFSLPAHNSVTS-LDHLQNSYFLSSFLWRDILGQSFKRINQYHVKKRPNVCAVLSSEGEPTSRQPPTPLDITNYPITHMKNLSIKELKQLAE       |
| <i>Alpinia officinale</i>  | 1   | MALFAFPFPHHLYGTA--ASNHQKATS-SPELITE---LHHRQEHSGSLRPKKRSSCVCAVLSSEIGEYHSQRPPPTPLDITNYPITHMKNLSIKELKQLAE |
| <i>Theobroma cacao</i>     | 1   | MALCAFSFPAHNNVAA--ASDFQKSTSFASFLGGTDLDFPHLKNQYVKKRPNVCAVLSERAEYHSQRPPPTPLDITNYPITHMKNLSIKELKQLAD       |
| <i>Hevea brasiliensis</i>  | 1   | MALSAFSLPAHNDVAT--ISDLQKYGVYPSLSLWRDILGQSLGRINQAKSKKRFVGVCAVLSERGEYHSQRPPPTPLDITNYPITHMKNLSIKELKQLAD   |
| <i>Ricinus communis</i>    | 1   | MALCAFSFPAHNNVITASSDLQKSNVYSSNFLKTDLLGSSLQKFNQAKKKRPNVCAVLSSEIGEYHSQRPPPTPLDITNYPITHMKNLSIKELKQLAD     |
| <i>Populus trichocarpa</i> | 100 | ELRSDVIFNYSKTTGGHLGSSLGVVELTVALHYVFNAPQDKILVDVGHQAVPHKILTGRRDKMVTTRQTNGLAGFTKRSESEYDCFGTGHSSSTISAGLGM  |
| <i>Alpinia officinale</i>  | 95  | ELRSDVIFNYSKTTGGHLGSSLGVVELTVALHYVFNAPQDKILVDVGHQAVPHKILTGRRDKMVTTRQTNGLAGFTKRSESEYDCFGTGHSSSTISAGLGM  |
| <i>Theobroma cacao</i>     | 99  | ELRSDVIFNYSKTTGGHLGSSLGVVELTVALHYVFNAPQDKILVDVGHQAVPHKILTGRRDKMVTTRQTNGLAGFTKRSESEYDCFGTGHSSSTISAGLGM  |
| <i>Hevea brasiliensis</i>  | 99  | ELRSDVIFNYSKTTGGHLGSSLGVVELTVALHYVFNAPQDKILVDVGHQAVPHKILTGRRDKMVTTRQTNGLAGFTKRSESEYDCFGTGHSSSTISAGLGM  |
| <i>Ricinus communis</i>    | 101 | ELRSDVIFNYSKTTGGHLGSSLGVVELTVALHYVFNAPQDKILVDVGHQAVPHKILTGRRDKMVTTRQTNGLAGFTKRSESEYDCFGTGHSSSTISAGLGM  |
|                            |     | TPP motif                                                                                              |
| <i>Populus trichocarpa</i> | 200 | AVGRDLKGRNNVAVIGDGAMTAGQAYEAMNAGYLDSDMIVILNDNKQVSLPTANLDGPIPPVGLSSALSRLQSNRPLRELREVAKVTKQIGGPMH        |
| <i>Alpinia officinale</i>  | 195 | AVGRDLKGRNNVAVIGDGAMTAGQAYEAMNAGYLDSDMIVILNDNKQVSLPTANLDGPIPPVGLSSALSRLQSNRPLRELREVAKVTKQIGGPMH        |
| <i>Theobroma cacao</i>     | 199 | AVGRDLKGRNNVAVIGDGAMTAGQAYEAMNAGYLDSDMIVILNDNKQVSLPTANLDGPIPPVGLSSALSRLQSNRPLRELREVAKVTKQIGGPMH        |
| <i>Hevea brasiliensis</i>  | 199 | AVGRDLKGRNNVAVIGDGAMTAGQAYEAMNAGYLDSDMIVILNDNKQVSLPTANLDGPIPPVGLSSALSRLQSNRPLRELREVAKVTKQIGGPMH        |
| <i>Ricinus communis</i>    | 201 | AVGRDLKGRNNVAVIGDGAMTAGQAYEAMNAGYLDSDMIVILNDNKQVSLPTANLDGPIPPVGLSSALSRLQSNRPLRELREVAKVTKQIGGPMH        |
| <i>Populus trichocarpa</i> | 300 | EIAAKVDEYARGMISGSGSTLFEELGLYYIGPVDGHNIDDLVAILKEVKSTKTTGPVLIHVVTEKGRGYPYAERAADKYHGVNKFDPATGKQKFSASTQ    |
| <i>Alpinia officinale</i>  | 295 | EIAAKVDEYARGMISGSGSTLFEELGLYYIGPVDGHNIDDLVAILKEVKSTKTTGPVLIHVVTEKGRGYPYAERAADKYHGVNKFDPATGKQKFSASTQ    |
| <i>Theobroma cacao</i>     | 299 | EIAAKVDEYARGMISGSGSTLFEELGLYYIGPVDGHNIDDLVAILKEVKSTKTTGPVLIHVVTEKGRGYPYAERAADKYHGVNKFDPATGKQKFSASTQ    |
| <i>Hevea brasiliensis</i>  | 299 | EIAAKVDEYARGMISGSGSTLFEELGLYYIGPVDGHNIDDLVAILKEVKSTKTTGPVLIHVVTEKGRGYPYAERAADKYHGVNKFDPATGKQKFSASTQ    |
| <i>Ricinus communis</i>    | 301 | EIAAKVDEYARGMISGSGSTLFEELGLYYIGPVDGHNIDDLVAILKEVKSTKTTGPVLIHVVTEKGRGYPYAERAADKYHGVNKFDPATGKQKFSASTQ    |
| <i>Populus trichocarpa</i> | 400 | SYTTYFAEALIAEAEDKDIIVATHAAMGGGTGLNLFRRFPTRCFDVGIAEQHAVTFAAGLACEGLKPFCAYSSFMQRAYDQVVDVLDLQKIPVRFAMD     |
| <i>Alpinia officinale</i>  | 395 | SYTTYFAEALIAEAEDKDIIVATHAAMGGGTGLNLFRRFPTRCFDVGIAEQHAVTFAAGLACEGLKPFCAYSSFMQRAYDQVVDVLDLQKIPVRFAMD     |
| <i>Theobroma cacao</i>     | 399 | SYTTYFAEALIAEAEDKDIIVATHAAMGGGTGLNLFRRFPTRCFDVGIAEQHAVTFAAGLACEGLKPFCAYSSFMQRAYDQVVDVLDLQKIPVRFAMD     |
| <i>Hevea brasiliensis</i>  | 399 | SYTTYFAEALIAEAEDKDIIVATHAAMGGGTGLNLFRRFPTRCFDVGIAEQHAVTFAAGLACEGLKPFCAYSSFMQRAYDQVVDVLDLQKIPVRFAMD     |
| <i>Ricinus communis</i>    | 401 | SYTTYFAEALIAEAEDKDIIVATHAAMGGGTGLNLFRRFPTRCFDVGIAEQHAVTFAAGLACEGLKPFCAYSSFMQRAYDQVVDVLDLQKIPVRFAMD     |
|                            |     | -DRAG-<br>NADH-binding motif PSD-                                                                      |
| <i>Populus trichocarpa</i> | 500 | RAG_VGADGPTHCGAFDVTFMACLPNMVMVPSDEAELFHMVATAAIDDRPSCFRYPNGVGVQLPPGNKGIPLEVGGKRIIEGERVALLGYGTAVQ        |
| <i>Alpinia officinale</i>  | 495 | RAG_VGADGPTHCGAFDVTFMACLPNMVMVPSDEAELFHMVATAAIDDRPSCFRYPNGVGVQLPPGNKGIPLEVGGKRIIEGERVALLGYGTAVQ        |
| <i>Theobroma cacao</i>     | 499 | RAG_VGADGPTHCGAFDVTFMACLPNMVMVPSDEAELFHMVATAAIDDRPSCFRYPNGVGVQLPPGNKGIPLEVGGKRIIEGERVALLGYGTAVQ        |
| <i>Hevea brasiliensis</i>  | 499 | RAG_VGADGPTHCGAFDVTFMACLPNMVMVPSDEAELFHMVATAAIDDRPSCFRYPNGVGVQLPPGNKGIPLEVGGKRIIEGERVALLGYGTAVQ        |
| <i>Ricinus communis</i>    | 501 | RAG_VGADGPTHCGAFDVTFMACLPNMVMVPSDEAELFHMVATAAIDDRPSCFRYPNGVGVQLPPGNKGIPLEVGGKRIIEGERVALLGYGTAVQ        |
| <i>Populus trichocarpa</i> | 600 | SCLAAASLVERHGLHITVADARFCKPLDHALIRSLAKSHEVLITVEEGSIGGFGSHVAHFALDGLLDGKIKWRPVLDPDRYIDHGSPADQLIEAGLTPS    |
| <i>Alpinia officinale</i>  | 595 | SCLAAASLVERHGLHITVADARFCKPLDHALIRSLAKSHEVLITVEEGSIGGFGSHVAHFALDGLLDGKIKWRPVLDPDRYIDHGSPADQLIEAGLTPS    |
| <i>Theobroma cacao</i>     | 599 | SCLAAASLVERHGLHITVADARFCKPLDHALIRSLAKSHEVLITVEEGSIGGFGSHVAHFALDGLLDGKIKWRPVLDPDRYIDHGSPADQLIEAGLTPS    |
| <i>Hevea brasiliensis</i>  | 599 | SCLAAASLVERHGLHITVADARFCKPLDHALIRSLAKSHEVLITVEEGSIGGFGSHVAHFALDGLLDGKIKWRPVLDPDRYIDHGSPADQLIEAGLTPS    |
| <i>Ricinus communis</i>    | 601 | SCLAAASLVERHGLHITVADARFCKPLDHALIRSLAKSHEVLITVEEGSIGGFGSHVAHFALDGLLDGKIKWRPVLDPDRYIDHGSPADQLIEAGLTPS    |
| <i>Populus trichocarpa</i> | 700 | HIAATVFNILGQRNSLIMSS                                                                                   |
| <i>Alpinia officinale</i>  | 695 | HIAATVFNILGQRNSLIMSS                                                                                   |
| <i>Theobroma cacao</i>     | 699 | HIAATVFNILGQRNSLIMSS                                                                                   |
| <i>Hevea brasiliensis</i>  | 699 | HIAATVFNILGQRNSLIMSS                                                                                   |
| <i>Ricinus communis</i>    | 701 | HIAATVFNILGQRNSLIMSS                                                                                   |

**Supplemental figure 2.** Deduced amino acid sequences of the conserved regions of *P. trichocarpa* *PtDXS* and of other *DXS* genes. The TPP motif and DRAG domain are numbered and indicated in the box.

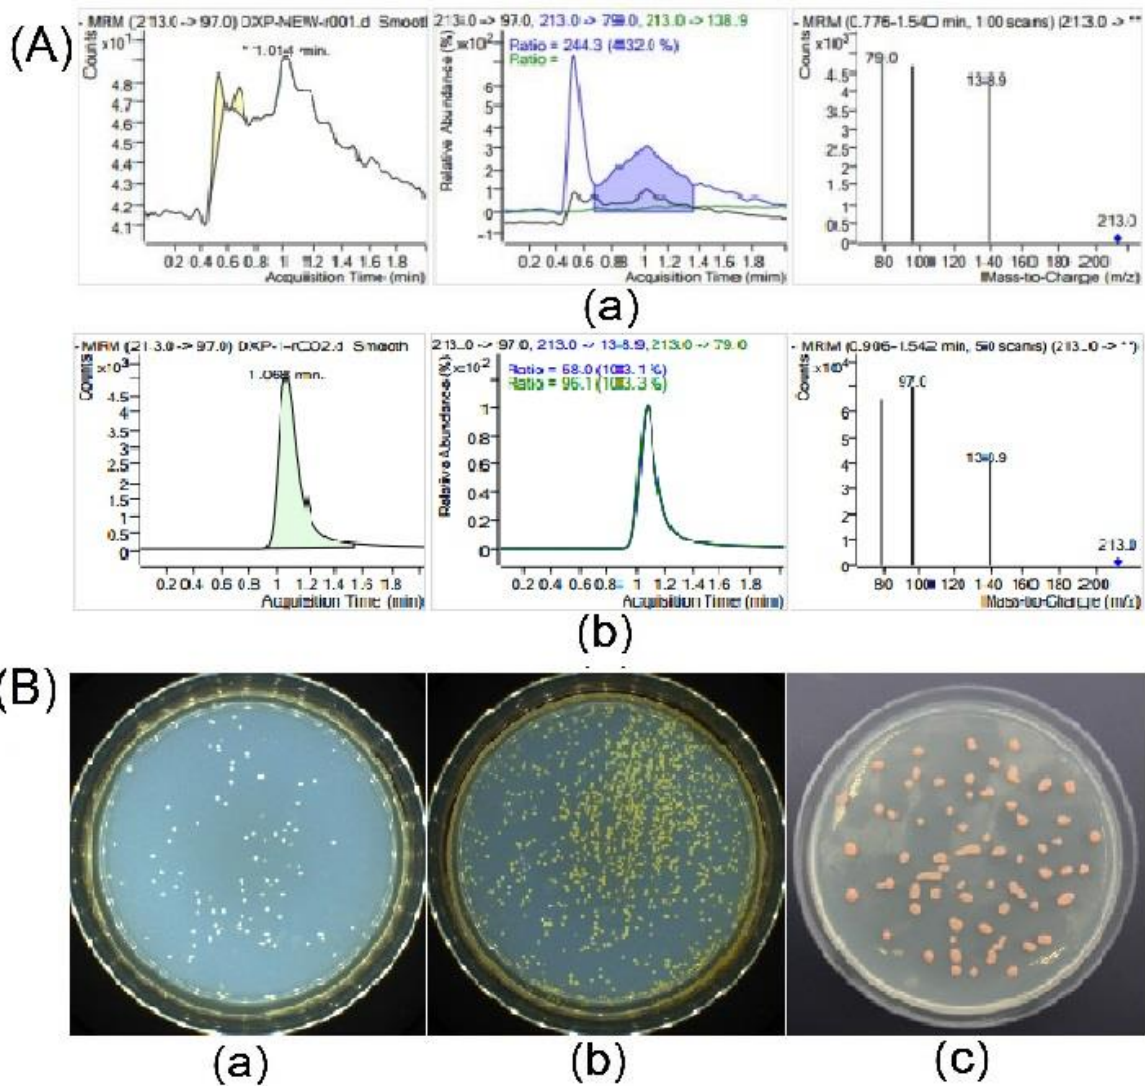

**Supplemental figure 3.** PtDXS activity in vitro and in vivo. (A) HPLC-MS/MS analysis of DXP (negative control group [a] and sample group [b]). (B) Functional analysis of PtDXS in *E. coli*. Single transformation of pTrc was performed as in [a]. *E. coli* cells harboring pTrc and pAC-BETA were treated as in [b]. *E. coli* cells harboring pTrc-PtDXS and pAC-BETA were treated as in [c].

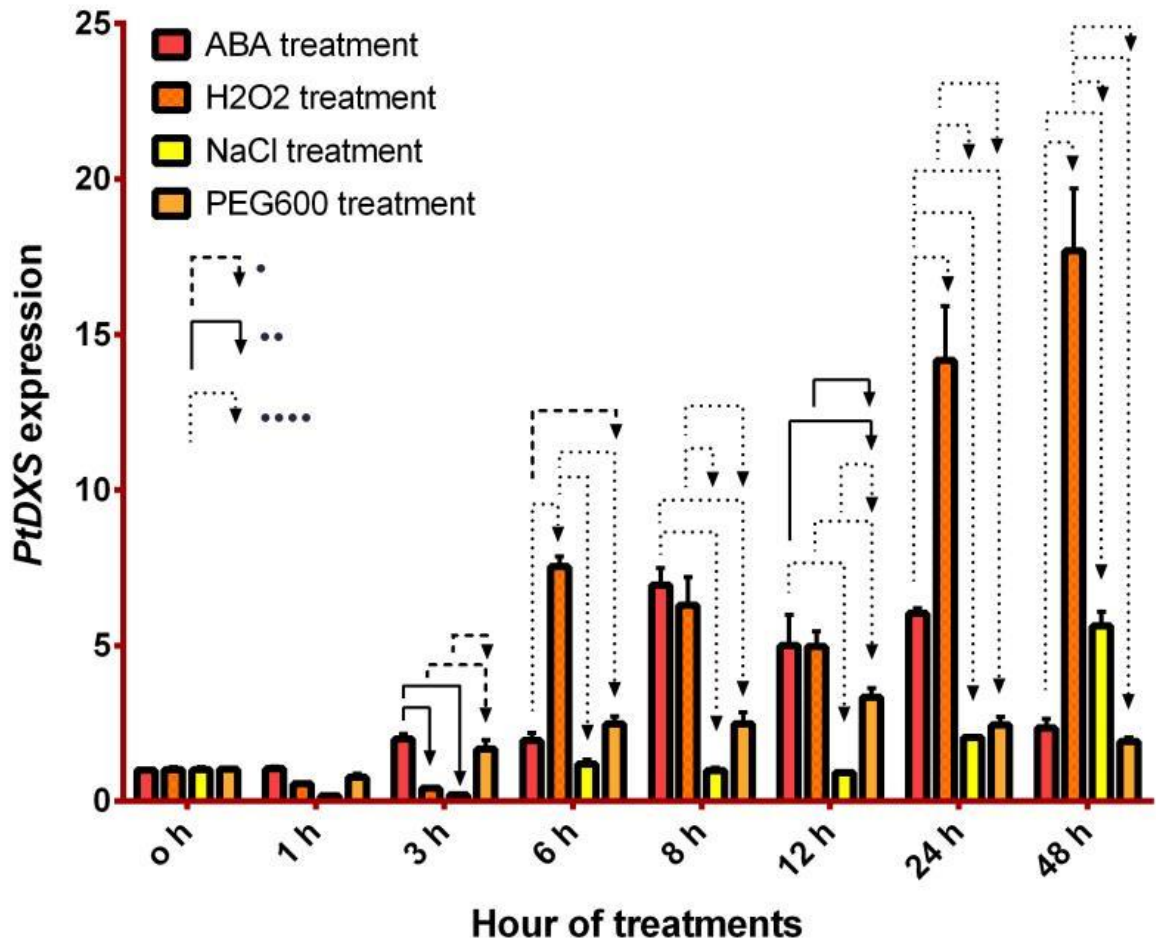

**Supplemental Figure 4.** Two-way ANOVA has been used to analyze the interaction between different abiotic stresses on *PtDXS* gene expression. \*, \*\*, and \*\*\*,  $P < 0.05$ ,  $P < 0.01$ , and  $P < 0.0001$ , respectively.

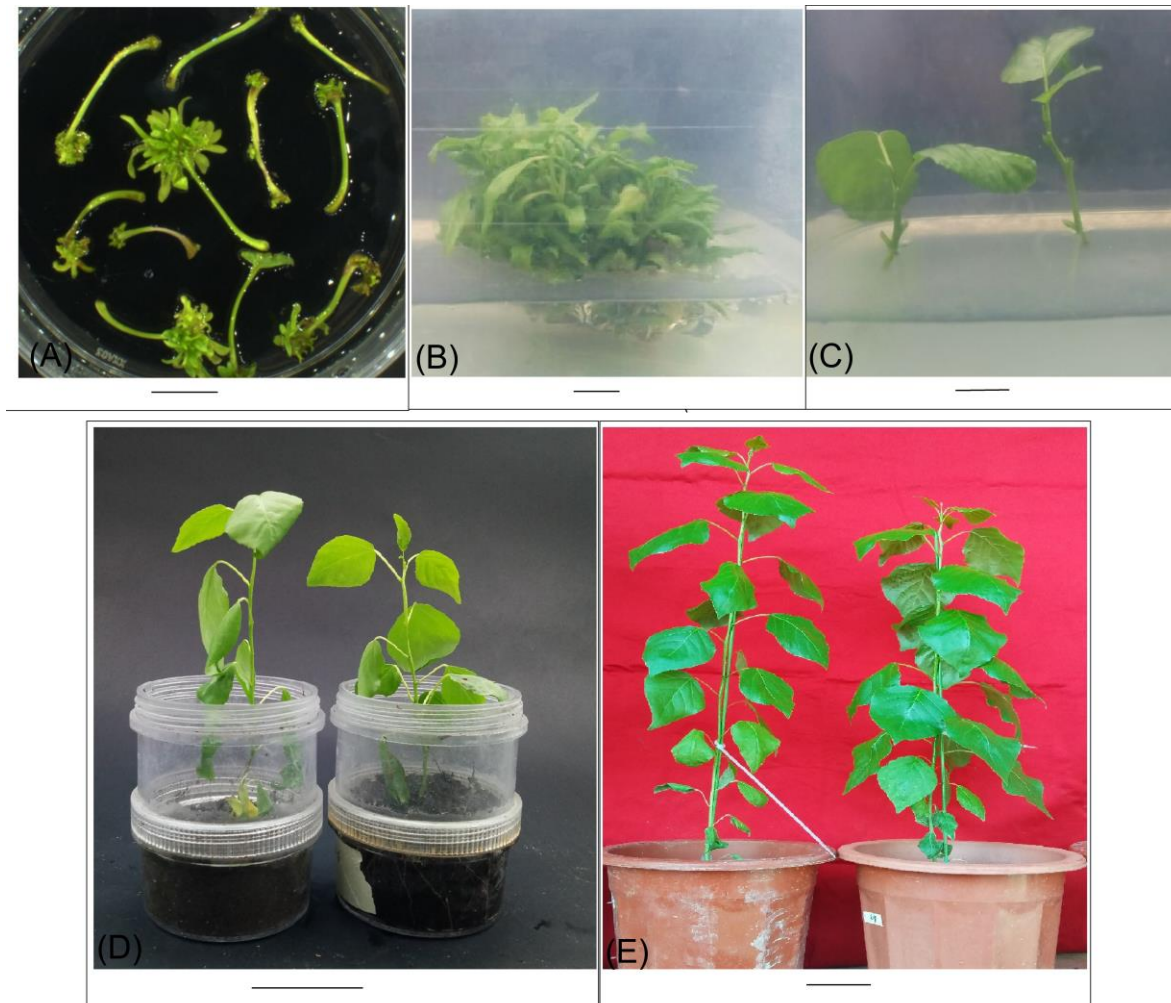

**Supplemental figure 5.** Regeneration of transformed explants on selective MS medium and regeneration of transgenic poplars in soil. (A) After co-cultivation of leaf pieces and petioles with *Agrobacterium* EHA105 containing *PtDXS*, transformed poplar plants were selected on regeneration medium supplemented with 30 mg/mL kanamycin. (B) Shoots were selected on bud elongation medium supplemented with 20 mg/mL kanamycin. (C) Roots were selected on half-strength MS medium supplemented with 10 mg/mL kanamycin. (D) and (E) Transgenic poplar seedlings grown in soil matrix. A and B Bar=1 cm. C Bar=1.5 cm. D Bar=3 cm. E Bar=6 cm.

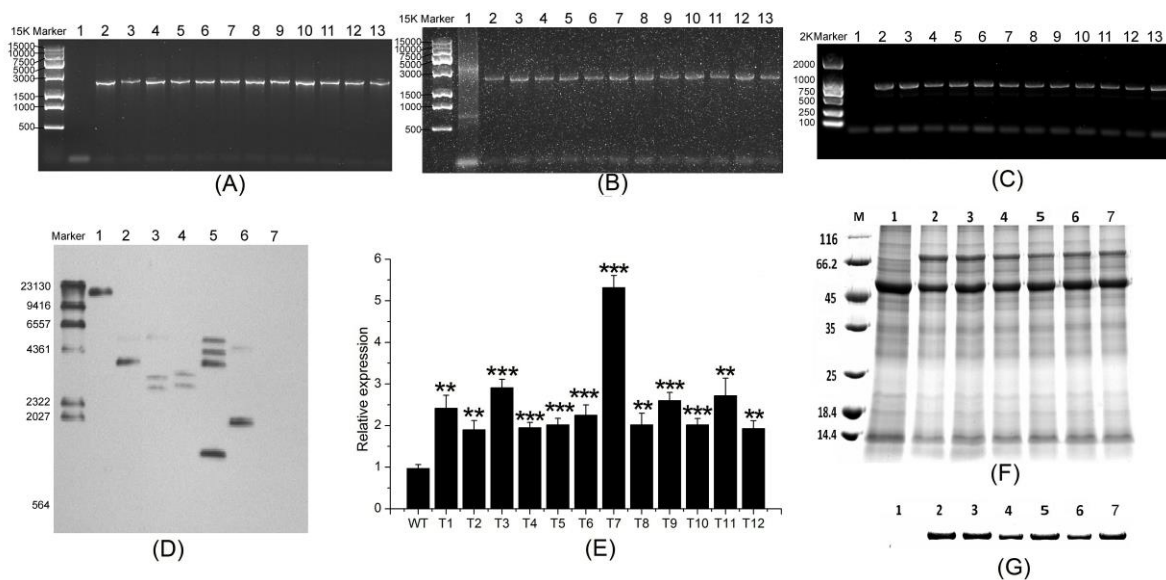

**Supplemental figure 6.** Identification of regenerated *PtDXS* transgenic poplar plants. (A) Detection of the *PtDXS* gene in transgenic lines and WT through PCR using the genome as template, the primer of the 35S promoter as the upstream primer, and the primer *PtDXS*-R as the downstream primer. Lane 1: negative control; lanes 2–13: transgenic lines 1–12 (T1-T12), respectively. (B) Detection of the *PtDXS* gene in transgenic lines and WT through PCR using the genome as template, the primer of the *PtDXS*-F as the upstream primer, and the primer *PtDXS*-R as the downstream primer. Lane 1: negative control; lanes 2–13: transgenic lines 1–12 (T1-T12), respectively. (C) Detection of the *kanamycin* gene in transgenic lines and WT through PCR using the genome as template, the primer of the *Kan*-F as the upstream primer, and the primer *Kan*-R as the downstream primer. Lane 1: negative control; lanes 2–13: transgenic lines 1–12 (T1-T12), respectively. (D) Southern blot analysis of transgenic poplars. Lane M: Marker. Lane 1: The vector PBGWB9-*PtDXS* digested with *EcoRI*. Lanes 2-6: Transgenic lines 1-5 (T1-T5) digested with *EcoRI*. Lanes 7: Wild-type poplars digested with *EcoRI*. (E) qRT-PCR analysis of *PtDXS* expression in WT and transgenic plants (T1-T12). (F) SDS-PAGE analysis of *PtDXS* levels in WT and transgenic plants. Lane M: protein markers; lanes 1–9: WT, T1, T2, T3, T7, T9, and T10 plants, respectively. (G) Western blot of *PtDXS* protein using a monoclonal antibody against the 6<sup>\*</sup>His tag. Lane M: Marker. Lane 1: Proteins from wild-type poplars. Lanes 2-7: Proteins from transgenic lines (T1, T2, T3, T7, T9, and T10), respectively.

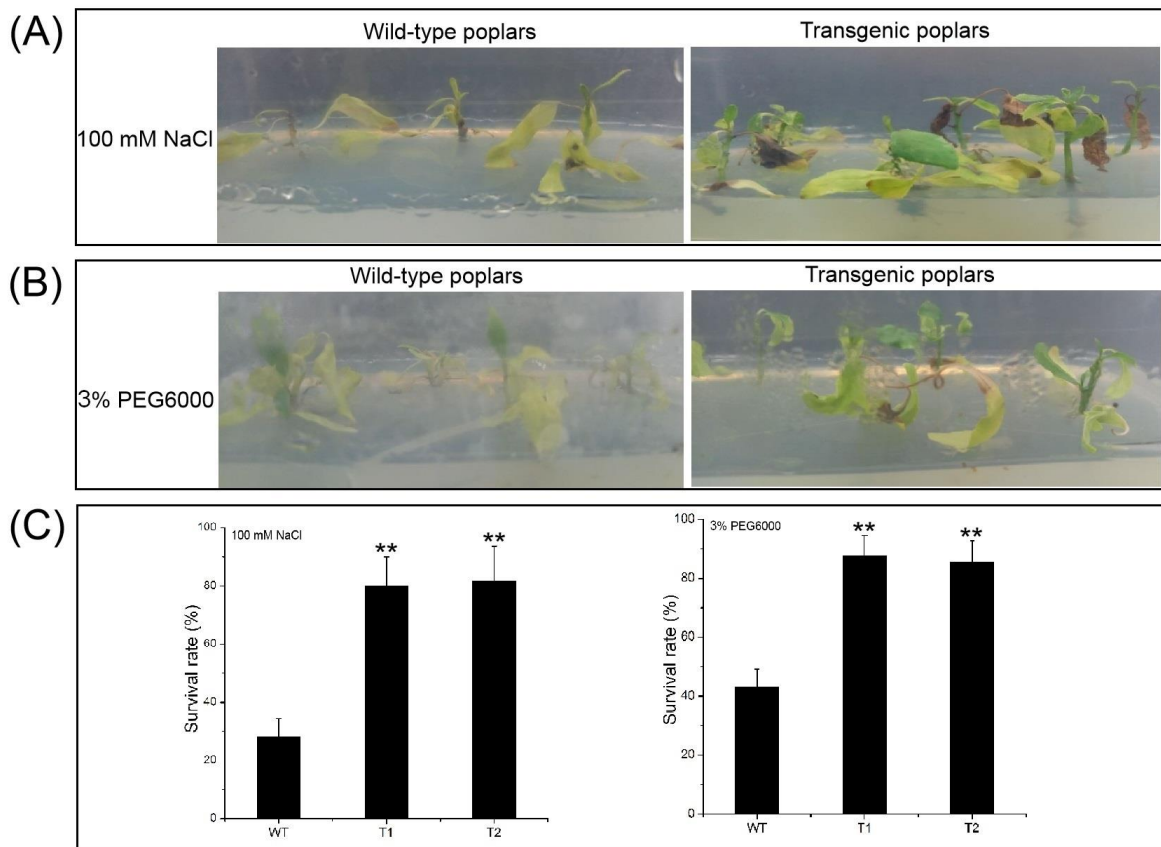

**Supplemental figure 7.** Rooting abilities of wild-type and transgenic poplars under 100 mM NaCl and 3% PEG6000. (A) Phenotype of WT and transgenic poplars treated with 100 mM NaCl. (B) Phenotype of WT and transgenic poplars treated with 3% PEG6000. (C) Survival rates after 100 mM NaCl and 3% PEG6000 treatment. \*, \*\*, and \*\*\*,  $P < 0.05$ ,  $P < 0.01$ , and  $P < 0.001$ , respectively.

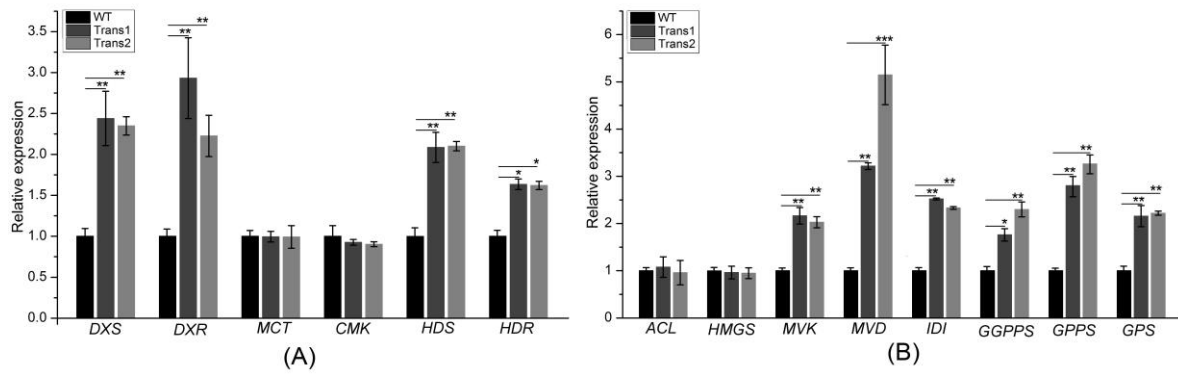

**Supplemental figure 8.** Expression levels of MEP- and MVA-related genes in the transgenic poplars overexpressing *PtHMGR* and WT poplars (Control). (A) Expression levels of *DXS*, *DXR*, *MCT*, *CMK*, *HDS*, and *HDR*. (B) Expression levels of *ACL*, *HMGS*, *MVK*, *MVD*, *IDI*, *GPS*, *GPPS*, and *GGPPS*. Vertical bars represent means  $\pm$  SE ( $n = 3$ ). Three independent experiments were performed. \*, \*\*, and \*\*\*,  $P < 0.05$ ,  $P < 0.01$ , and  $P < 0.001$ , respectively.

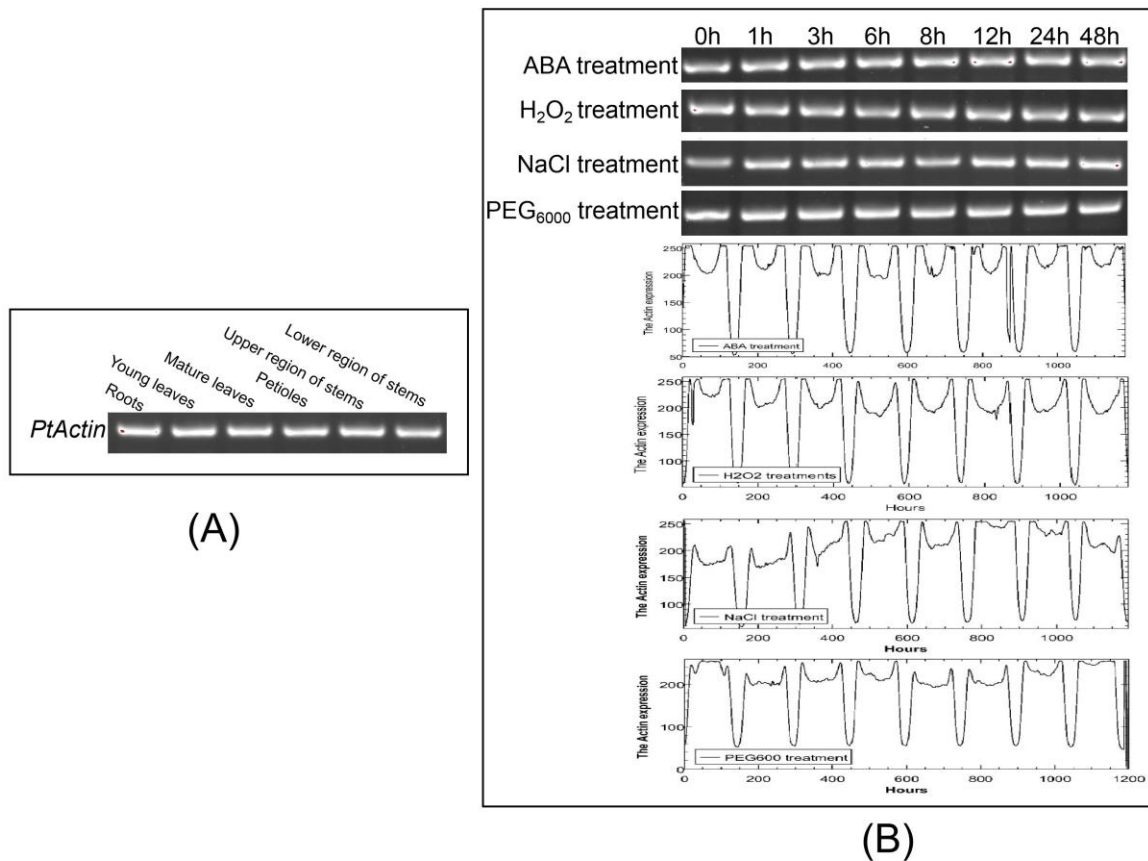

**Supplemental figure 9.** The  $\beta actin$  gene was selected as a reference gene. The  $\beta actin$  expression in different organs of poplars and experimental conditions was investigated by RT-PCR. (A) The expression of  $\beta actin$  in roots, young and mature leaves, petioles, and upper and lower regions of stems. (B) The expression of  $\beta actin$  under the 200  $\mu M$  ABA, 2 mM H<sub>2</sub>O<sub>2</sub>, 200 mM NaCl treatment and 10% PEG6000 treatments.
